# Supplementary material
Source: Royal Society of Chemistry journal article supplement (doi:10.1039/d6tb00399k)
Supplement: d6tb00399k1.pdf [file d6tb00399k1.pdf]

1 **Hybrid Membrane-Camouflaged CuS Nanoplatfom for Synergistic**  
2 **Nanotherapy of Ovarian Cancer via Chemodynamic and Sonodynamic Effects**

3

4 *Yuxin Jiang*<sup>a, #</sup>, *Runzi Guo*<sup>b, c, d, #</sup>, *Zhaojun Cui*<sup>b, c, d, #</sup>, *Hongtao Hu*<sup>a</sup>, *Lin Yuan*<sup>a</sup>, *Xun*

5 *Xu*<sup>a</sup>, *Lin Lin*<sup>e, \*</sup>, *Xiuhui Wang*<sup>b, c, \*</sup>, *Wenjun Cheng*<sup>a, \*</sup>

6

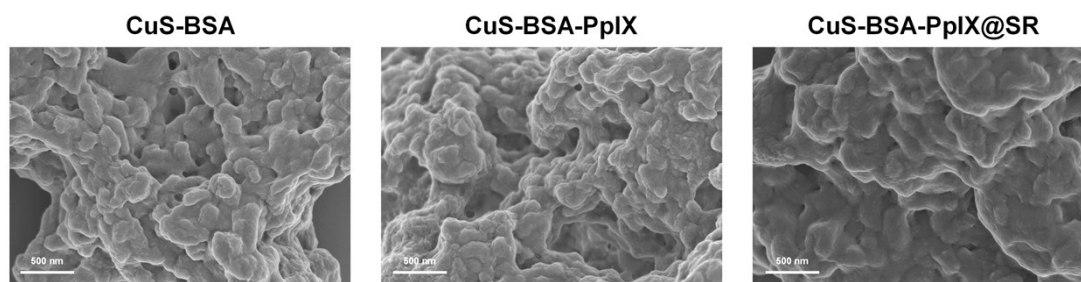

8 **Figure S1.** SEM images of CuS, CuS-BSA-PpIX, and CuS-BSA-PpIX@SR nanoparticles.

9

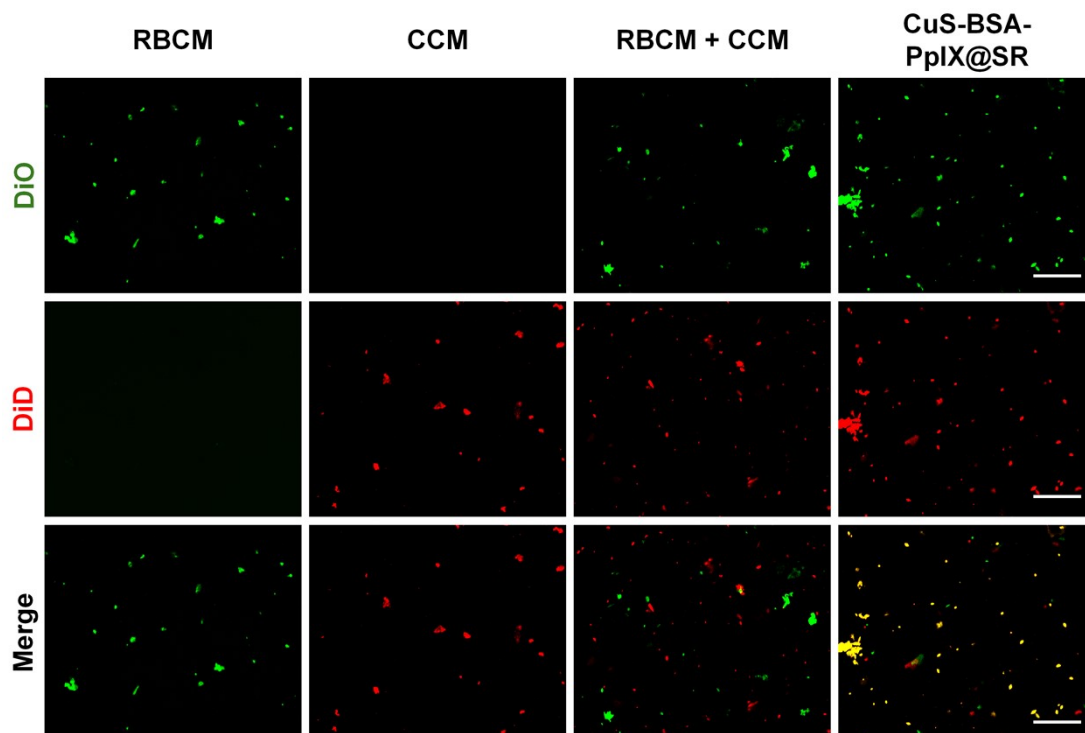

10

11 **Figure S2.** Fluorescent microscopy images of CuS-BSA-PpIX@SR (green = CCM, red = RBCM,  
12 brilliant yellow = merge) (Scale bar: 500 μm).

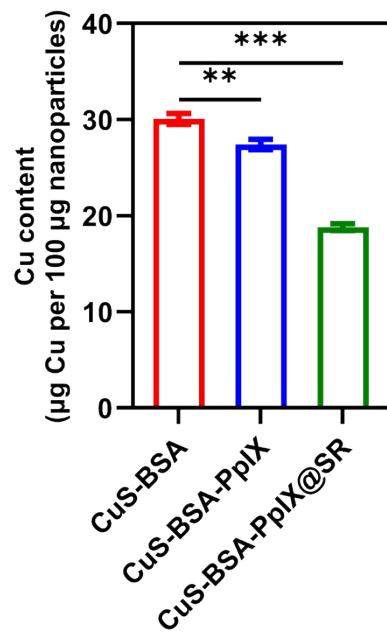

1

2 **Figure S3.** Analysis of Cu content in different nanoparticles (unit: µg Cu per 100 µg  
 3 nanoparticles). Data are presented as mean ± SD (n = 3). Statistical analysis: one-way ANOVA,  
 4 Tukey's multiple comparisons test. Significance differences are indicated as \*\* $p < 0.01$  and  
 5 \*\*\* $p < 0.001$ , respectively.

6

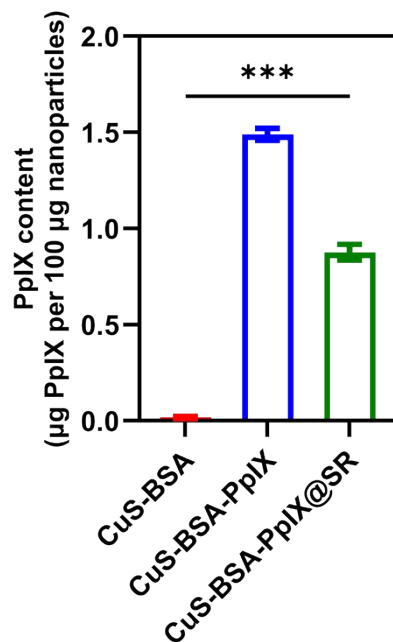

7

8 **Figure S4.** Analysis of PpIX content in different nanoparticles (unit: µg PpIX per 100 µg  
 9 nanoparticles). Data are presented as mean ± SD (n = 3). Statistical analysis: one-way ANOVA,  
 10 Tukey's multiple comparisons test. Significance differences are indicated as \*\*\* $p < 0.001$ ,  
 11 respectively.

12

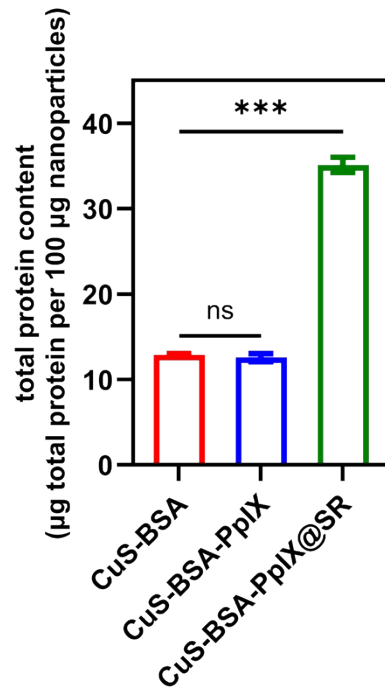

1  
 2 **Figure S5.** Analysis of total protein content in different nanoparticles (unit: µg total protein per  
 3 100 µg nanoparticles). Data are presented as mean ± SD (n = 3). Statistical analysis: one-way  
 4 ANOVA, Tukey's multiple comparisons test. Significance differences are indicated as ns and  
 5 \*\*\* $p < 0.001$ , respectively.  
 6

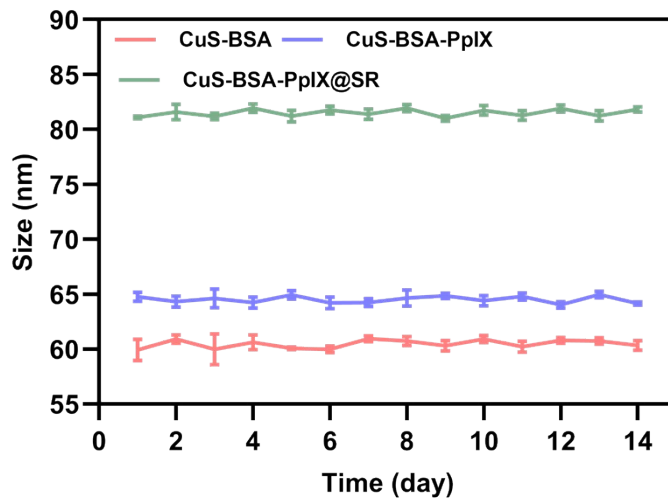

7  
 8 **Figure S6.** Hydrodynamic size stability analysis of CuS-BSA, CuS-BSA-PpIX and CuS-BSA-  
 9 PpIX@SR after incubation in PBS for 14 days. Data are presented as mean ± SD (n = 3).

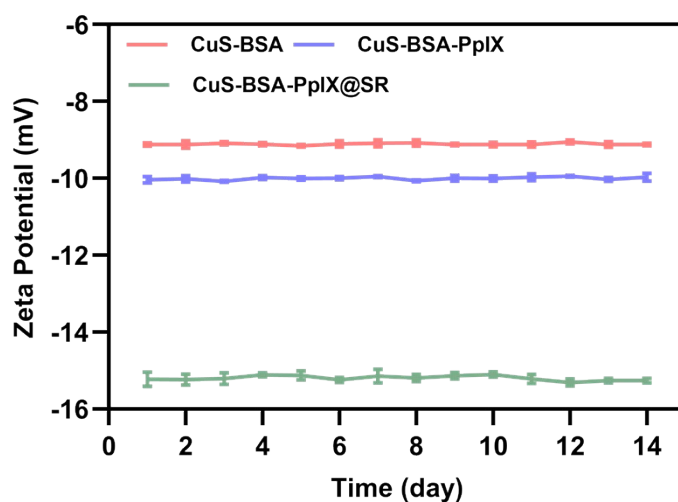

1

2 **Figure S7.** Zeta potential stability analysis of CuS-BSA, CuS-BSA-PpIX and CuS-BSA-  
 3 PpIX@SR after incubation in PBS for 14 days. Data are presented as mean  $\pm$  SD (n = 3).

4

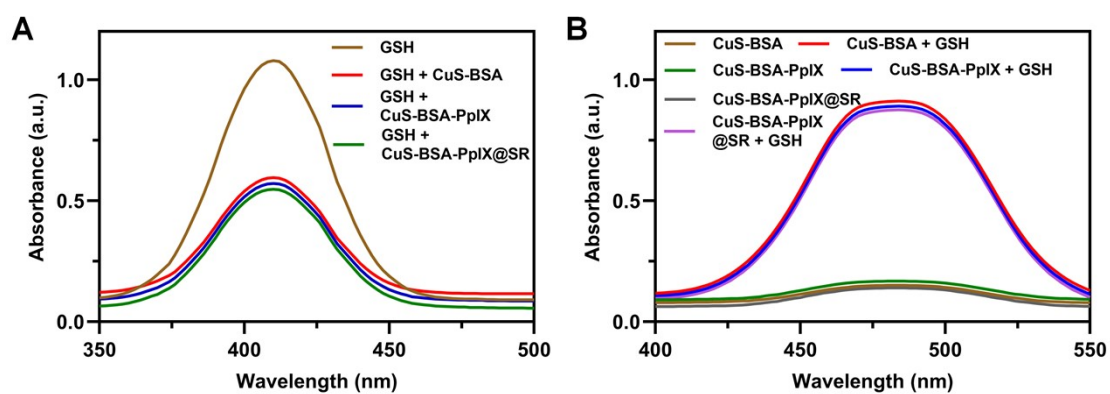

5

6 **Figure S8.** (A). UV-Vis of residual GSH after incubation with various CuS-based nanoplateforms.  
 7 (B). UV-Vis of Cu<sup>+</sup> generated by various CuS-based nanoplateforms in the presence of GSH.

8

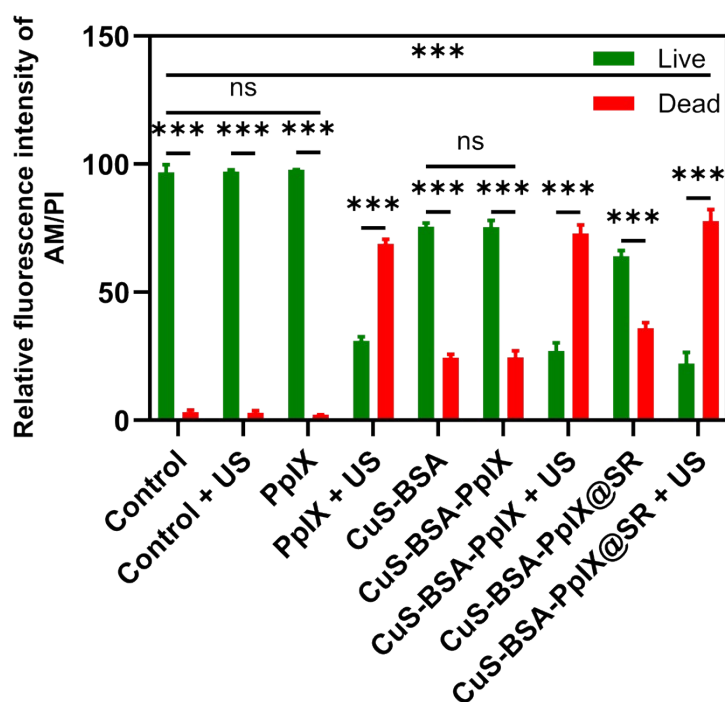

1

2 **Figure S9.** Semi-quantitative analysis of live (green) and dead (red) cell fluorescence intensity  
 3 based on live/dead staining images. Data are presented as mean  $\pm$  SD (n = 3). Statistical analysis  
 4 was performed using two-way ANOVA.

5

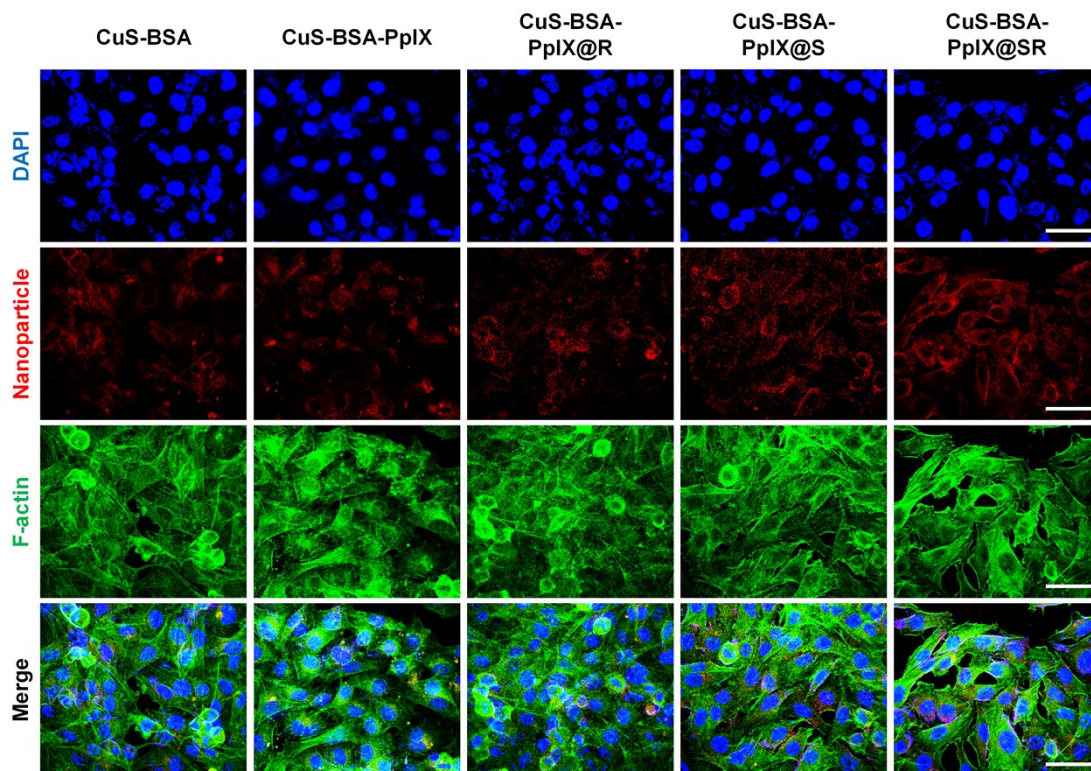

6

7 **Figure S10.** Confocal fluorescence images of HUVEC cells after nanoparticle treatment (scale bar:  
 8 50  $\mu$ m).

1

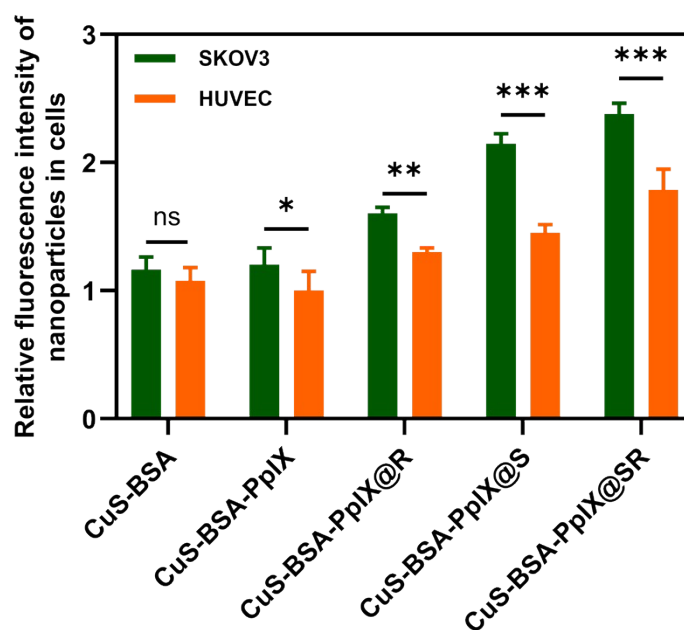

2

3 **Figure S11.** Semi-quantitative analysis of nanoparticle uptake by SKOV3 and HUVEC cells after  
4 co-incubation. Data are presented as mean  $\pm$  SD ( $n = 3$ ). Statistical analysis: two-way ANOVA,  
5 Tukey's multiple-comparisons test. Significance differences are indicated as ns and \*\*\* $p < 0.001$ ,  
6 respectively.

7

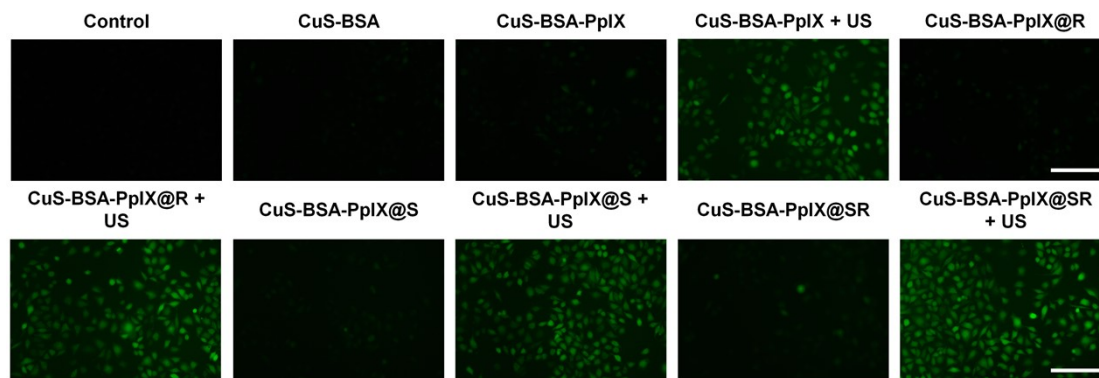

8

9 **Figure S12.** Detection of intracellular ROS generation in HUVEC cells after nanoparticle  
10 treatment (scale bar: 200  $\mu\text{m}$ ).

11

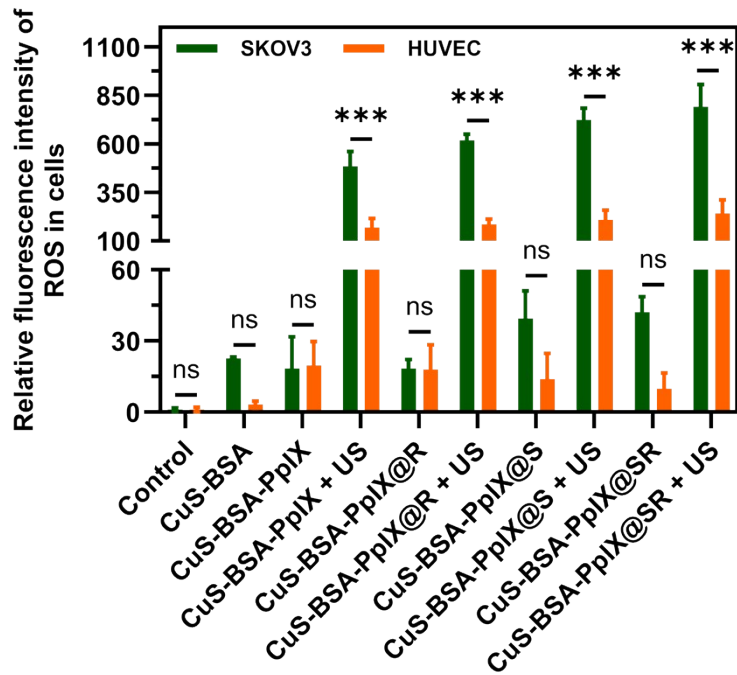

1

2 **Figure S13.** Semi-quantitative analysis of ROS generation by SKOV3 and HUVEC cells after co-  
 3 incubation. Data are presented as mean  $\pm$  SD (n = 3). Statistical analysis: two-way ANOVA,  
 4 Tukey's multiple-comparisons test. Significance differences are indicated as ns, \* $p$ <0.05 and  
 5 \*\*\* $p$ <0.001, respectively.

6

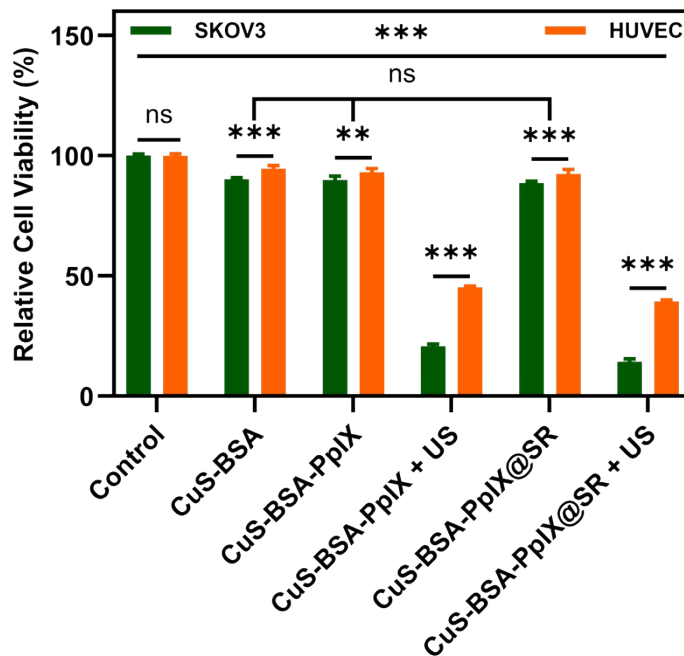

7

8 **Figure S14.** Comparison of cell viability after co-culture of nanoparticles with SKOV3 and  
 9 HUVEC cells. Data are presented as mean  $\pm$  SD (n = 3). Statistical analysis: two-way ANOVA,  
 10 Tukey's multiple-comparisons test. Significance differences are indicated as ns, \*\* $p$ <0.01 and

1 \*\*\* $p < 0.001$ , respectively.

2

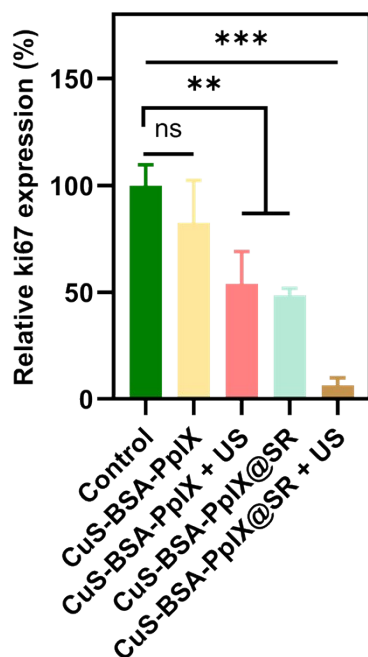

3

4 **Figure S15.** Semi-quantification of ki67-positive cells in tumor tissues. Data are presented as  
5 mean  $\pm$  SD (n = 3). Statistical analysis: one-way ANOVA, Tukey's multiple-comparisons test.

6 Significance differences are indicated as ns, \*\* $p < 0.01$  and \*\*\* $p < 0.001$ , respectively.

7

8

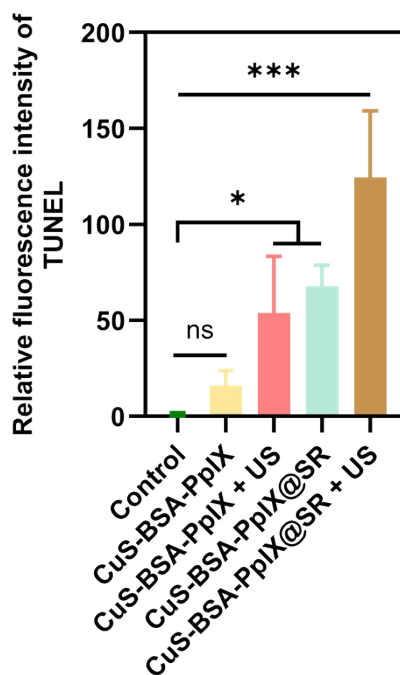

9

10 **Figure S16.** Semi-quantification of TUNEL-positive cells in tumor tissues. Data are presented as

- 1 mean  $\pm$  SD (n = 3). Statistical analysis: one-way ANOVA, Tukey's multiple-comparisons test.
- 2 Significance differences are indicated as ns, \* $p$ <0.05 and \*\*\* $p$ <0.001, respectively.
- 3
